# Supplementary material for: A method for histopathological study of the multifocal nature of spinal cord lesions in murine experimental autoimmune encephalomyelitis
Source: PeerJ. 2016 Jan 26;4:e1600. doi: 10.7717/peerj.1600 (PMC4741089; doi:10.7717/peerj.1600)
Supplement: Supplemental Information 1 — Raw Data for Figure 3. [file peerj-04-1600-s001.xlsx]

## Sheet: Histopathology score
Case #	% of spinal cord affected by EAE (cranial to caudal)
14R0823	30	20	90	100
14R0826	100	50	80	40
14R0892	90	80	100	80
14R0893	90	50	70	90
14R0894	100	60	80	80
14R0929	30	20	0	10
14R0930	80	60	60	90
14R0932	70	20	80	80
14R0962	90	80	50	40
14R0963	100	70	70	100
14R0964	80	20	10	90
14R0965	70	70	80	100

## Sheet: Clinical score
Case #	Clinical Score (Table 1)
14R0823	2
14R0826	4
14R0892	4
14R0893	4
14R0894	4
14R0929	2
14R0930	4
14R0932	4
14R0962	3
14R0963	4
14R0964	3
14R0965	3
